# Supplementary material for: Management of Chorioamnionitis-Exposed Infants in the Newborn Nursery Using a Clinical Examination–Based Approach
Source: Oxford University Press journal article supplement (doi:10.1542/hpeds.2018-0201), 2019-04-01
Supplement: hpeds_2018-0201supplementarydata.pdf [file hpeds_2018-0201supplementarydata.pdf]

## Supplemental Information

**SUPPLEMENTAL TABLE 4** EOS Cases in All Infants  $\geq 34$  Weeks' Gestation Born During QI Time Period (2015–2017)

| Case No. | Risk Factors                                                                                                        | Clinical Signs                      | Age at Presentation, h | Highest I:T Ratio | Highest CRP, md/dL | NSC Score Risk Factors Only | NSC Score After Clinical Examination <sup>a</sup> | Organism         |
|----------|---------------------------------------------------------------------------------------------------------------------|-------------------------------------|------------------------|-------------------|--------------------|-----------------------------|---------------------------------------------------|------------------|
| 1        | GA: 35 wk<br>Maternal Tmax: 37.0°C<br>ROM: 17 h<br>GBS status: negative<br>Intrapartum antibiotic: none             | Respiratory distress requiring CPAP | Birth                  | 0.71              | 9.6                | 0.98                        | 20.4                                              | GBS              |
| 2        | GA: 39 wk;<br>Maternal Tmax: 37.2°C<br>ROM: 3.5 h<br>GBS status: negative<br>Intrapartum antibiotic: none           | Respiratory distress requiring CPAP | 6                      | 0.17              | 4.4                | 0.16                        | 3.31                                              | GBS              |
| 3        | GA: 40 wk<br>Maternal Tmax: 38.3°C<br>ROM: 0.4 h<br>GBS status: positive<br>Intrapartum antibiotic: none            | New-onset tachypnea                 | 24                     | 0.6               | 13.6               | 0.93                        | 4.63                                              | GBS <sup>b</sup> |
| 4        | GA: 39 wk<br>Maternal Tmax: 37.0°C<br>ROM: 5.5 h<br>GBS status: unknown<br>Intrapartum antibiotic: none             | Seizures                            | 36                     | 0.83              | 19.0               | 0.14                        | 0.06                                              | GBS <sup>c</sup> |
| 5        | GA: 37 wk<br>Maternal Tmax: 37.2°C<br>ROM: 17 h<br>GBS status: unknown <sup>d</sup><br>Intrapartum antibiotic: none | Fever <sup>e</sup>                  | 64                     | 0.28              | 8.8                | 0.39                        | 0.16                                              | GBS              |

Cohort represents  $n = 12901$  births  $\geq 34$  wk gestation. CPAP, continuous positive airway pressure; GA, gestational age; I:T, Immature to Total Neutrophil Ratio; maternal Tmax, highest maternal temperature during labor; ROM, rupture of membranes duration.

<sup>a</sup> Most severe clinical presentation in first 24 h of life.

<sup>b</sup> Infant born to a mother with chorioamnionitis during phase II of QI project.

<sup>c</sup> Infant additionally grew GBS from cerebrospinal fluid culture.

<sup>d</sup> Unknown during labor, found to be positive postdelivery.

<sup>e</sup> Infant born to mother with poorly controlled diabetes and required a central line placement at 24 h for intravenous dextrose. Initial CRP was 0.7 md/dL at 23 h and 1.0 md/dL at 39 h. New-onset fever at 64 h of life, prompting sepsis laboratories and antibiotics.
